# Supplementary material
Source: publisher figshare collection journal article supplement (https://frontiersin.figshare.com/ndownloader/files/18812489)
Supplement: Supplementary file 1 [file 18812489]

## Sheet: Sheet1
Supplemental Table 2: Mean (+/- 1SD) duration, number of pulses, starting frequency (f­start), ending frequency (fend), central frequency (fcenter), peak frequency (f­peak), minimum frequency (fmin), maximum frequency (fmax), bandwidth, average slope of the first half of the call (s1), and slope of the second half of the call (s2) of Eptesicus fuscus, Nycticeius humeralis, and Tadarida brasiliens…
Species	Call Type	n	duration	Pulses	fstart	fend	fcenter	fpeak	fmin	fmax	fmean	bandwidth	S1	S2
Eptesicus fuscus	Echolocation	40	8.1 ± 1.6	1.0 ± 0.0	56.1 ± 6.8	28.1 ± 1.5	34.0 ± 2.3	31.8 ± 2.1	28.1 ± 1.5	56.1 ± 6.8	36.3 ± 2.6	28 ± 6.5	-5.7 ± 1.8	-1.5 ± 0.6
	Complex	306	93.9 ± 25.5	3.8 ± 0.9	49.4 ± 11.1	20.9 ± 3.7	26.8 ± 6.2	26.9 ± 4.5	19.2 ± 3.8	51.6 ± 11.2	27.5 ± 3.9	32.4 ± 11.8	-0.5 ± 0.3	-0.1 ± 0.1
	Downsweep	67	21.5 ± 7.3	1.0 ± 0.0	36.9 ± 8.1	19.4 ± 6.5	25.2 ± 7.4	26.0 ± 6.1	18.8 ± 6.0	37.3 ± 8.2	25.8 ± 6.4	18.5 ± 7.3	-1.1 ± 0.7	-0.6 ± 0.6
	Inverted-U	57	19.2 ± 6.9	1.0 ± 0.0	30.5 ± 7.4	31.9 ± 11.3	40.3 ± 11.6	32.8 ± 7.7	27.3 ± 7.4	42.6 ± 12.3	35.8 ± 9.8	15.23 ± 7.8	1.0 ± 0.6	-0.9 ± 0.8
	Oscillating	23	28.4 ± 11.2	1.0 ± 0.0	40.5 ± 11.1	36.6 ± 12.7	37.6 ± 13.1	33.1 ± 8.4	29.6 ± 8.7	46.4 ± 10.4	37.5 ± 9.8	16.7 ±6.8	-0.2 ± 0.7	-0.0 ± 0.7
	QCF	17	16.4 ± 4.8	1.0 ± 0.0	34.4 ± 10.6	34.5 ± 11.6	35.5 ± 11.7	35.1 ±11.2	33.3 ± 11.0	36.4 ± 11.4	34.9 ± 11.4	3.1 ± 1.0	0.2 ± 0.3	-0.2 ± 0.2
	U-Shaped	75	17.0 ± 6.1	1.0 ± 0.0	49.3 ± 10.4	53.53 ± 14.2	42.6 ±11.6	40.2 ± 9.7	39.0 ± 10.3	57.0 ± 14.2	45.7 ± 11.1	18.0 ± 10.5	-0.9 ± 1.0	1.4 ± 1.0
	Upsweep	195	14.6 ± 5.0	1.0 ± 0.0	34.6 ± 9.9	55.9 ± 11.8	44.5 ± 10.8	37.4 ± 10.1	33.8 ± 10.0	56.3 ± 11.7	44.7 ± 10.0	22.5 ± 10.0	1.4 ± 0.9	1.7 ± 1.1
Nycticeius humeralis	Echolocation	40	7.8 ± 1.5	1.0 ± 0.0	64.4 ± 7.5	36.3 ± 1.3	39.2 ± 2.0	38.6 ± 2.1	36.3 ± 1.4	64.4 ± 7.5	41.6 ± 2.6	28.1 ± 7.5	-6.8 ± 2.7	-0.8 ± 0.6
	Complex	5	45.8 ± 28.6	1.0 ± 0.0	34.7 ± 11.7	21.8 ± 4.1	25.1 ± 3.0	22.1 ± 5.1	19.0 ± 2.8	38.1 ± 7.3	24.5 ± 2.2	19.1 ± 8.0	-0.5 ± 0.4	-0.1 ± 0.3
	Downsweep	439	36.8 ± 8.1	1.0 ± 0.0	50.9 ± 11.4	22.6 ± 5.3	31.0 ± 6.4	29.3 ± 5.7	22.0 ± 5.2	50.9 ± 11.5	32.4 ± 6.4	28.9 ± 10.3	-1.1 ± 0.6	-0.5 ± 0.3
	Oscillating	43	41.7 ± 10.8	1.0 ± 0.0	24.6 ± 4.0	20.7 ± 5.2	27.4 ± 4.8	23.2 ± 3.0	18.51 ± 4.0	30.2 ± 5.2	24.5 ± 4.1	11.7 ± 4.2	0.1 ± 0.2	-0.3 ± 0.2
	QCF	40	17.1 ± 4.1	1.0 ± 0.0	24.0 ± 5.1	24.3 ± 5.3	24.3 ± 5.0	24.3 ± 5.0	23.3 ± 5.1	25.5 ± 5.2	24.3 ± 5.0	2.2 ± 1.2	-0.1 ± 0.2	0.0 ± 0.2
	U-Shaped	3	23.2 ± 10.2	1.0 ± 0.0	22.8 ± 6.9	20.8 ± 7.7	18.1 ± 6.9	18.4 ± 6.4	17.63 ± 6.8	27.4 ± 7.1	19.3 ± 6.7	9.7 ± 8.0	-0.5 ± 0.3	0.3 ± 0.3
	Upsweep	341	16.4 ± 2.9	1.0 ± 0.0	21.6 ± 3.4	31.4 ± 4.0	26.0 ± 3.0	24.1 ± 2.7	21.3 ± 2.7	31.8 ± 4.5	26.1 ± 2.9	10.5 ± 3.8	0.5 ± 0.3	0.7 ± 0.3
Tadarida brasiliensis	Echolocation	40	11.7 ± 2.7	1.0 ± 0.0	35.5 ± 5.3	24.1 ± 3.1	27.3 ± 2.7	27.1 ± 2.7	23.5 ± 2.9	35.5 ± 5.0	27.9 ± 2.6	12.0 ± 5.3	-1.6 ± 1.0	-0.7 ± 0.9
	Complex	30	580.3 ± 495.6	14.6 ± 13.5	26.6 ± 4.9	19.9 ± 3.7	23.3 ± 6.1	19.0 ± 5.3	13.9 ± 3.0	38.4 ± 8.6	22.0 ± 3.8	24.6 ± 8.1	-0.1 ± 0.3	-0.1 ± 0.2
	Downsweep	1	19	1	38.7	20.5	26	22.7	20.5	38.7	26.7	18.2	-1.3	-0.6
	Inverted-U	4	18.3 ± 1.3	1.0 ± 0.0	32.7 ± 1.3	35.0 ± 0.5	48.8 ± 0.3	41.9 ± 2.8	32.2 ± 1.3	49.0 ± 0.2	42.8 ± 0.6	16.8 ± 1.4	1.8 ± 0.2	-1.5 ± 0.1
	Oscillating	2	0.3 ± 3.2	1.0 ± 0.0	22.7 ± 2.1	16.0 ± 13.1	15.6 ± 3.7	16.1 ± 4.1	12.4 ± 8.0	25.4 ± 1.6	19.2 ± 3.7	13.0 ± 6.4	-0.7 ± 0.5	0.1 ± 1.1
	U-Shaped	16	15.7 ± 3.7	1.0 ± 0.0	26.4 ± 3.6	23.4 ± 3.9	17.6 ± 3.4	18.4 ±3.6	17.1 ± 3.3	27.2 ± 3.4	20.8 ± 3.5	10.1 ± 3.8	-1.1 ± 0.4	0.8 ± 0.2
